# Supplementary material for: Human multilineage pro-epicardium/foregut organoids support the development of an epicardium/myocardium organoid
Source: PubMed Central journal article supplement (PMC9666429; doi:10.1038/s41467-022-34730-7), 2022-11-15
Supplement: 41467_2022_34730_MOESM3_ESM.pdf [file 41467_2022_34730_MOESM3_ESM.pdf]

## **Description of Additional Supplementary Files**

File Name: Supplementary Data 1

Description: Differential expression analysis for D3WB vs D3 and D5WB vs D5 conditions
